# Supplementary material for: Outer Membrane Vesicles of Acinetobacter baumannii DS002 Are Selectively Enriched with TonB-Dependent Transporters and Play a Key Role in Iron Acquisition
Source: PubMed Central journal article supplement (PMC9045253; doi:10.1128/spectrum.00293-22), 2022-03-10
Supplement: spectrum00293-22_supp_1_seq8.pdf [file spectrum00293-22_supp_1_seq8.pdf]

Table S1: List of 302 proteins with their putative functions.

| Acc. No.   | Protein Name                                                | Description by eggNOG Mapper                                                                                                                                                    | COG_category | FUNCTION CLASS                     | FUNCTION                                                              |
|------------|-------------------------------------------------------------|---------------------------------------------------------------------------------------------------------------------------------------------------------------------------------|--------------|------------------------------------|-----------------------------------------------------------------------|
| AVP32905.1 | Outer-membrane lipoprotein carrier protein                  | Participates in the translocation of lipoproteins from the inner membrane to the outer membrane. Only forms a complex with a lipoprotein if the residue after the N-term        | M            | CELLULAR PROCESSES AND SIGNALING   | Cell wall/membrane/envelope biogenesis (M)                            |
| AVP32912.1 | Multidrug efflux pump subunit AcrA                          | Belongs to the membrane fusion protein (MFP) (TC 8.A.1) family                                                                                                                  | M            | CELLULAR PROCESSES AND SIGNALING   | Cell wall/membrane/envelope biogenesis (M)                            |
| AVP32993.1 | Outer membrane protein Omp38                                | Belongs to the ompA family                                                                                                                                                      | M            | CELLULAR PROCESSES AND SIGNALING   | Cell wall/membrane/envelope biogenesis (M)                            |
| AVP33066.1 | Photosystem I P700 chlorophyll a apoprotein A2              | Belongs to the ompA family                                                                                                                                                      | M            | CELLULAR PROCESSES AND SIGNALING   | Cell wall/membrane/envelope biogenesis (M)                            |
| AVP33362.1 | hypothetical protein C6W84_03545                            | Nucleoside-specific channel-forming protein, Tsx                                                                                                                                | M            | CELLULAR PROCESSES AND SIGNALING   | Cell wall/membrane/envelope biogenesis (M)                            |
| AVP33433.1 | L-Ala--D-Glu endopeptidase                                  | Peptidase family M23                                                                                                                                                            | M            | CELLULAR PROCESSES AND SIGNALING   | Cell wall/membrane/envelope biogenesis (M)                            |
| AVP33493.1 | Membrane-bound lytic murein transglycosylase B              | Lytic murein transglycosylase                                                                                                                                                   | M            | CELLULAR PROCESSES AND SIGNALING   | Cell wall/membrane/envelope biogenesis (M)                            |
| AVP33501.1 | Peptidyl-prolyl cis-trans isomerase A                       | PIPlases accelerate the folding of proteins. It catalyzes the cis-trans isomerization of proline imidic peptide bonds in oligopeptides                                          | M            | CELLULAR PROCESSES AND SIGNALING   | Cell wall/membrane/envelope biogenesis (M)                            |
| AVP33616.1 | Vitamin B12 transporter BtuB                                | TonB dependent receptor                                                                                                                                                         | M            | CELLULAR PROCESSES AND SIGNALING   | Cell wall/membrane/envelope biogenesis (M)                            |
| AVP33651.1 | D-alanyl-D-alanine endopeptidase                            | Belongs to the peptidase S11 family                                                                                                                                             | M            | CELLULAR PROCESSES AND SIGNALING   | Cell wall/membrane/envelope biogenesis (M)                            |
| AVP33863.1 | Tail-specific protease                                      | Belongs to the peptidase S41A family                                                                                                                                            | M            | CELLULAR PROCESSES AND SIGNALING   | Cell wall/membrane/envelope biogenesis (M)                            |
| AVP33874.1 | Outer membrane protein assembly factor BamB                 | Part of the outer membrane protein assembly complex, which is involved in assembly and insertion of beta-barrel proteins into the outer membrane                                | M            | CELLULAR PROCESSES AND SIGNALING   | Cell wall/membrane/envelope biogenesis (M)                            |
| AVP33882.1 | Toxin and drug export protein A                             | Outer membrane efflux protein                                                                                                                                                   | M            | CELLULAR PROCESSES AND SIGNALING   | Cell wall/membrane/envelope biogenesis (M)                            |
| AVP33884.1 | LPS-assembly lipoprotein LptE                               | Together with LptD, is involved in the assembly of lipopolysaccharide (LPS) at the surface of the outer membrane. Required for the proper assembly of LptD. Binds LPS and       | M            | CELLULAR PROCESSES AND SIGNALING   | Cell wall/membrane/envelope biogenesis (M)                            |
| AVP34056.1 | Outer-membrane lipoprotein LolB                             | Plays a critical role in the incorporation of lipoproteins in the outer membrane after they are released by the LolA protein                                                    | M            | CELLULAR PROCESSES AND SIGNALING   | Cell wall/membrane/envelope biogenesis (M)                            |
| AVP34059.1 | Outer membrane protein assembly factor BamD                 | Part of the outer membrane protein assembly complex, which is involved in assembly and insertion of beta-barrel proteins into the outer membrane                                | M            | CELLULAR PROCESSES AND SIGNALING   | Cell wall/membrane/envelope biogenesis (M)                            |
| AVP34094.1 | putative lipoprotein YiaD                                   | Belongs to the ompA family                                                                                                                                                      | M            | CELLULAR PROCESSES AND SIGNALING   | Cell wall/membrane/envelope biogenesis (M)                            |
| AVP34115.1 | Gamma-glutamyltranspeptidase                                | Gamma-glutamyltranspeptidase                                                                                                                                                    | M            | CELLULAR PROCESSES AND SIGNALING   | Cell wall/membrane/envelope biogenesis (M)                            |
| AVP34209.1 | Membrane-bound lytic murein transglycosylase D              | COG0741 Soluble lytic murein transglycosylase and related regulatory proteins (some contain LysM invasin domains)                                                               | M            | CELLULAR PROCESSES AND SIGNALING   | Cell wall/membrane/envelope biogenesis (M)                            |
| AVP34252.1 | Putative lipoprotein                                        | Curli production assembly/transport component CsgG                                                                                                                              | M            | CELLULAR PROCESSES AND SIGNALING   | Cell wall/membrane/envelope biogenesis (M)                            |
| AVP34296.1 | Metalloprotease Loip                                        | Peptidase family M48                                                                                                                                                            | M            | CELLULAR PROCESSES AND SIGNALING   | Cell wall/membrane/envelope biogenesis (M)                            |
| AVP34558.1 | hypothetical protein C6W84_11740                            | Outer membrane protein (OmpH-like)                                                                                                                                              | M            | CELLULAR PROCESSES AND SIGNALING   | Cell wall/membrane/envelope biogenesis (M)                            |
| AVP34598.1 | Putative phospholipase A1                                   | Phospholipase                                                                                                                                                                   | M            | CELLULAR PROCESSES AND SIGNALING   | Cell wall/membrane/envelope biogenesis (M)                            |
| AVP34773.1 | Major outer membrane protein P.IB                           | Gram-negative porin                                                                                                                                                             | M            | CELLULAR PROCESSES AND SIGNALING   | Cell wall/membrane/envelope biogenesis (M)                            |
| AVP34862.1 | Chaperone SurA                                              | Chaperone involved in the correct folding and assembly of outer membrane proteins. Recognizes specific patterns of aromatic residues and the orientation of their side c        | M            | CELLULAR PROCESSES AND SIGNALING   | Cell wall/membrane/envelope biogenesis (M)                            |
| AVP34890.1 | Beta-lactamase OXA-133                                      | Penicillin binding protein transpeptidase domain                                                                                                                                | M            | CELLULAR PROCESSES AND SIGNALING   | Cell wall/membrane/envelope biogenesis (M)                            |
| AVP35121.1 | Membrane-bound lytic murein transglycosylase B              | Transglycosylase SLT domain                                                                                                                                                     | M            | CELLULAR PROCESSES AND SIGNALING   | Cell wall/membrane/envelope biogenesis (M)                            |
| AVP35122.1 | Endolytic peptidoglycan transglycosylase RlpA               | Lytic transglycosylase with a strong preference for naked glycan strands that lack stem peptides                                                                                | M            | CELLULAR PROCESSES AND SIGNALING   | Cell wall/membrane/envelope biogenesis (M)                            |
| AVP35163.1 | Putative L,D-transpeptidase YkuD                            | ErfK YbiS YcF5 YnhG family protein                                                                                                                                              | M            | CELLULAR PROCESSES AND SIGNALING   | Cell wall/membrane/envelope biogenesis (M)                            |
| AVP35285.1 | Peptidoglycan-associated lipoprotein                        | Belongs to the ompA family                                                                                                                                                      | M            | CELLULAR PROCESSES AND SIGNALING   | Cell wall/membrane/envelope biogenesis (M)                            |
| AXU43350.1 | Antibiotic efflux pump outer membrane protein ArpC          | Outer membrane efflux protein                                                                                                                                                   | M            | CELLULAR PROCESSES AND SIGNALING   | Cell wall/membrane/envelope biogenesis (M)                            |
| AXU43351.1 | Solvent efflux pump outer membrane protein SrpC             | Outer membrane efflux protein                                                                                                                                                   | M            | CELLULAR PROCESSES AND SIGNALING   | Cell wall/membrane/envelope biogenesis (M)                            |
| AXU43387.1 | Porin B                                                     | Carbohydrate-selective porin, OprB family                                                                                                                                       | M            | CELLULAR PROCESSES AND SIGNALING   | Cell wall/membrane/envelope biogenesis (M)                            |
| AXU43427.1 | AXU43427.1                                                  | COG0741 Soluble lytic murein transglycosylase and related regulatory proteins (some contain LysM invasin domains)                                                               | M            | CELLULAR PROCESSES AND SIGNALING   | Cell wall/membrane/envelope biogenesis (M)                            |
| AXU43632.1 | hypothetical protein C6W84_1565                             | Has lipid A 3-O-deacylase activity. Hydrolyzes the ester bond at the 3 position of lipid A, a bioactive component of lipopolysaccharide (LPS), thereby releasing the primary    | M            | CELLULAR PROCESSES AND SIGNALING   | Cell wall/membrane/envelope biogenesis (M)                            |
| AXU43670.1 | putative FKBP-type peptidyl-prolyl cis-trans isomerase FkpA | peptidyl-prolyl cis-trans isomerase                                                                                                                                             | M            | CELLULAR PROCESSES AND SIGNALING   | Cell wall/membrane/envelope biogenesis (M)                            |
| AXU43672.1 | Polysialic acid transport protein KpsD                      | Polysaccharide biosynthesis/export protein                                                                                                                                      | M            | CELLULAR PROCESSES AND SIGNALING   | Cell wall/membrane/envelope biogenesis (M)                            |
| AXU43713.1 | Soluble lytic murein transglycosylase                       | Transglycosylase SLT domain                                                                                                                                                     | M            | CELLULAR PROCESSES AND SIGNALING   | Cell wall/membrane/envelope biogenesis (M)                            |
| AXU43751.1 | hypothetical protein C6W84_2160                             | OmpW family                                                                                                                                                                     | M            | CELLULAR PROCESSES AND SIGNALING   | Cell wall/membrane/envelope biogenesis (M)                            |
| AXU43838.1 | hypothetical protein C6W84_2595                             | OmpA family                                                                                                                                                                     | M            | CELLULAR PROCESSES AND SIGNALING   | Cell wall/membrane/envelope biogenesis (M)                            |
| AXU43869.1 | putative phospholipid-binding lipoprotein MlaA              | MlaA lipoprotein                                                                                                                                                                | M            | CELLULAR PROCESSES AND SIGNALING   | Cell wall/membrane/envelope biogenesis (M)                            |
| AXU44210.1 | Outer membrane protein assembly factor BamA                 | Part of the outer membrane protein assembly complex, which is involved in assembly and insertion of beta-barrel proteins into the outer membrane                                | M            | CELLULAR PROCESSES AND SIGNALING   | Cell wall/membrane/envelope biogenesis (M)                            |
| AXU44211.1 | Outer membrane protein assembly factor BamA                 | Part of the outer membrane protein assembly complex, which is involved in assembly and insertion of beta-barrel proteins into the outer membrane                                | M            | CELLULAR PROCESSES AND SIGNALING   | Cell wall/membrane/envelope biogenesis (M)                            |
| AXU44499.1 | hypothetical protein C6W84_5900                             | OmpW family                                                                                                                                                                     | M            | CELLULAR PROCESSES AND SIGNALING   | Cell wall/membrane/envelope biogenesis (M)                            |
| AXU44500.1 | hypothetical protein C6W84_5905                             | OmpW family                                                                                                                                                                     | M            | CELLULAR PROCESSES AND SIGNALING   | Cell wall/membrane/envelope biogenesis (M)                            |
| AXU43614.1 | hypothetical protein C6W84_1475                             | Gram-negative-bacterium-type cell outer membrane assembly                                                                                                                       | M            | CELLULAR PROCESSES AND SIGNALING   | Cell wall/membrane/envelope biogenesis (M)                            |
| AXU44343.1 | LPS-assembly protein LptD                                   | lipopolysaccharide transport                                                                                                                                                    | M            | CELLULAR PROCESSES AND SIGNALING   | Cell wall/membrane/envelope biogenesis (M)                            |
| AXU43372.1 | putative NTE family protein                                 | Esterase of the alpha-beta hydrolase superfamily                                                                                                                                | M            | CELLULAR PROCESSES AND SIGNALING   | Cell wall/membrane/envelope biogenesis (M)                            |
| AVP35179.1 | D-alanyl-D-alanine carboxypeptidase DacA                    | Belongs to the peptidase S11 family                                                                                                                                             | M            | CELLULAR PROCESSES AND SIGNALING   | Cell wall/membrane/envelope biogenesis (M)                            |
| AVP34631.1 | Porin B                                                     | wide pore channel activity                                                                                                                                                      | M            | CELLULAR PROCESSES AND SIGNALING   | Cell wall/membrane/envelope biogenesis (M)                            |
| AVP35300.1 | hypothetical protein C6W84_16625                            | Outer membrane efflux protein                                                                                                                                                   | M            | CELLULAR PROCESSES AND SIGNALING   | Cell wall/membrane/envelope biogenesis (M)                            |
| AVP34177.1 | Lipoprotein NlpE                                            | regulation of cell-substrate adhesion                                                                                                                                           | M            | CELLULAR PROCESSES AND SIGNALING   | Cell wall/membrane/envelope biogenesis (M)                            |
| AVP32981.1 | putative thiol:disulfide interchange protein DsbC           | Required for disulfide bond formation in some periplasmic proteins. Acts by transferring its disulfide bond to other proteins and is reduced in the process                     | O            | CELLULAR PROCESSES AND SIGNALING   | Post-translational modification, protein turnover, and chaperones (O) |
| AVP33025.1 | hypothetical protein C6W84_01290                            | META domain                                                                                                                                                                     | O            | CELLULAR PROCESSES AND SIGNALING   | Post-translational modification, protein turnover, and chaperones (O) |
| AVP33520.1 | Thiol:disulfide interchange protein DsbA                    | Thiol disulfide interchange protein                                                                                                                                             | O            | CELLULAR PROCESSES AND SIGNALING   | Post-translational modification, protein turnover, and chaperones (O) |
| AXU44584.1 | Periplasmic pH-dependent serine endoprotease DegQ           | Belongs to the peptidase S1C family                                                                                                                                             | O            | CELLULAR PROCESSES AND SIGNALING   | Post-translational modification, protein turnover, and chaperones (O) |
| AVP35272.1 | hypothetical protein C6W84_16425                            | protein with SCP PR1 domains                                                                                                                                                    | O            | CELLULAR PROCESSES AND SIGNALING   | Post-translational modification, protein turnover, and chaperones (O) |
| AVP34606.1 | ATP-dependent Clp protease ATP-binding subunit ClpA         | Belongs to the ClpA ClpB family                                                                                                                                                 | O            | CELLULAR PROCESSES AND SIGNALING   | Post-translational modification, protein turnover, and chaperones (O) |
| AVP34461.1 | Peptidyl-prolyl cis-trans isomerase cyp18                   | PIPlases accelerate the folding of proteins. It catalyzes the cis-trans isomerization of proline imidic peptide bonds in oligopeptides                                          | O            | CELLULAR PROCESSES AND SIGNALING   | Post-translational modification, protein turnover, and chaperones (O) |
| AVP34317.1 | Alkyl hydroperoxide reductase subunit C                     | alkyl hydroperoxide reductase                                                                                                                                                   | O            | CELLULAR PROCESSES AND SIGNALING   | Post-translational modification, protein turnover, and chaperones (O) |
| AVP33947.1 | Thioredoxin C-2                                             | Belongs to the thioredoxin family                                                                                                                                               | O            | CELLULAR PROCESSES AND SIGNALING   | Post-translational modification, protein turnover, and chaperones (O) |
| AVP33530.1 | putative FKBP-type peptidyl-prolyl cis-trans isomerase FkpA | Peptidyl-prolyl cis-trans isomerase                                                                                                                                             | O            | CELLULAR PROCESSES AND SIGNALING   | Post-translational modification, protein turnover, and chaperones (O) |
| AVP32929.1 | Modulator of FtsH protease HflK                             | stress-induced mitochondrial fusion                                                                                                                                             | O            | CELLULAR PROCESSES AND SIGNALING   | Post-translational modification, protein turnover, and chaperones (O) |
| AVP34707.1 | Biopolymer transport protein ExbD                           | Biopolymer transport protein ExbD/ToIR                                                                                                                                          | U            | CELLULAR PROCESSES AND SIGNALING   | Intracellular trafficking, secretion, and vesicular transport (U)     |
| AVP34963.1 | hypothetical protein C6W84_14240                            | hemolysin activation secretion protein                                                                                                                                          | U            | CELLULAR PROCESSES AND SIGNALING   | Intracellular trafficking, secretion, and vesicular transport (U)     |
| AVP35284.1 | Protein TolB                                                | Involved in the TonB-independent uptake of proteins                                                                                                                             | U            | CELLULAR PROCESSES AND SIGNALING   | Intracellular trafficking, secretion, and vesicular transport (U)     |
| AXU43834.1 | hypothetical protein C6W84_2575                             | TIGRFAM conserved repeat domain                                                                                                                                                 | U            | CELLULAR PROCESSES AND SIGNALING   | Intracellular trafficking, secretion, and vesicular transport (U)     |
| AVP35252.1 | Signal peptidase I                                          | signal peptide processing                                                                                                                                                       | U            | CELLULAR PROCESSES AND SIGNALING   | Intracellular trafficking, secretion, and vesicular transport (U)     |
| AVP33228.1 | Type IV pilus biogenesis and competence protein PilQ        | Type ii and iii secretion system protein                                                                                                                                        | U            | CELLULAR PROCESSES AND SIGNALING   | Intracellular trafficking, secretion, and vesicular transport (U)     |
| AXU44519.1 | Beta-lactamase                                              | Beta-lactamase                                                                                                                                                                  | V            | CELLULAR PROCESSES AND SIGNALING   | Defense mechanisms (V)                                                |
| AXU44520.1 | Beta-lactamase                                              | Beta-lactamase                                                                                                                                                                  | V            | CELLULAR PROCESSES AND SIGNALING   | Defense mechanisms (V)                                                |
| AVP34562.1 | Cell division coordinator CpoB                              | TolA binding protein trimerisation                                                                                                                                              | D            | CELLULAR PROCESSES AND SIGNALING   | Cell cycle control, cell division, chromosome partitioning (D)        |
| AXU43953.1 | Septum site-determining protein MinD                        | cell division                                                                                                                                                                   | D            | CELLULAR PROCESSES AND SIGNALING   | Cell cycle control, cell division, chromosome partitioning (D)        |
| AVP33531.1 | Tyrosine-protein kinase ptk                                 | protein tyrosine kinase activity                                                                                                                                                | D            | CELLULAR PROCESSES AND SIGNALING   | Cell cycle control, cell division, chromosome partitioning (D)        |
| AVP34373.1 | hypothetical protein C6W84_10445                            | Universal stress protein                                                                                                                                                        | T            | CELLULAR PROCESSES AND SIGNALING   | Signal transduction mechanisms (T)                                    |
| AVP33997.1 | Transcriptional regulatory protein RstA                     | Transcriptional regulatory protein, C terminal                                                                                                                                  | T            | CELLULAR PROCESSES AND SIGNALING   | Signal transduction mechanisms (T)                                    |
| AVP33077.1 | 50S ribosomal protein L13                                   | This protein is one of the early assembly proteins of the 50S ribosomal subunit, although it is not seen to bind rRNA by itself. It is important during the early stages of 50S | J            | INFORMATION STORAGE AND PROCESSING | Translation, ribosomal structure and biogenesis (J)                   |
| AVP33078.1 | 30S ribosomal protein S9                                    | Belongs to the universal ribosomal protein uS9 family                                                                                                                           | J            | INFORMATION STORAGE AND PROCESSING | Translation, ribosomal structure and biogenesis (J)                   |
| AVP33090.1 | hypothetical protein C6W84_01765                            | Belongs to the RNase T2 family                                                                                                                                                  | J            | INFORMATION STORAGE AND PROCESSING | Translation, ribosomal structure and biogenesis (J)                   |
| AVP33112.1 | 50S ribosomal protein L17                                   | Ribosomal protein L17                                                                                                                                                           | J            | INFORMATION STORAGE AND PROCESSING | Translation, ribosomal structure and biogenesis (J)                   |
| AVP33114.1 | 30S ribosomal protein S4                                    | One of the primary rRNA binding proteins, it binds directly to 16S rRNA where it nucleates assembly of the body of the 30S subunit                                              | J            | INFORMATION STORAGE AND PROCESSING | Translation, ribosomal structure and biogenesis (J)                   |
| AVP33115.1 | 30S ribosomal protein S11                                   | Located on the platform of the 30S subunit, it bridges several disparate RNA helices of the 16S rRNA. Forms part of the Shine-Dalgarno cleft in the 70S ribosome                | J            | INFORMATION STORAGE AND PROCESSING | Translation, ribosomal structure and biogenesis (J)                   |
| AVP33119.1 | 50S ribosomal protein L15                                   | binds to the 23S rRNA                                                                                                                                                           | J            | INFORMATION STORAGE AND PROCESSING | Translation, ribosomal structure and biogenesis (J)                   |
| AVP33122.1 | 50S ribosomal protein L18                                   | This is one of the proteins that binds and probably mediates the attachment of the 5S RNA into the large ribosomal subunit, where it forms part of the central protuberan       | J            | INFORMATION STORAGE AND PROCESSING | Translation, ribosomal structure and biogenesis (J)                   |
| AVP33123.1 | 50S ribosomal protein L6                                    | This protein binds to the 23S rRNA, and is important in its secondary structure. It is located near the subunit interface in the base of the L7 L12 stalk, and near the tRNA bi | J            | INFORMATION STORAGE AND PROCESSING | Translation, ribosomal structure and biogenesis (J)                   |
| AVP33124.1 | 30S ribosomal protein S8                                    | One of the primary rRNA binding proteins, it binds directly to 16S rRNA central domain where it helps coordinate assembly of the platform of the 30S subunit                    | J            | INFORMATION STORAGE AND PROCESSING | Translation, ribosomal structure and biogenesis (J)                   |

|            |                                                                         |                                                                                                                                                                               |   |                                    |                                                     |
|------------|-------------------------------------------------------------------------|-------------------------------------------------------------------------------------------------------------------------------------------------------------------------------|---|------------------------------------|-----------------------------------------------------|
| AVP33126.1 | 50S ribosomal protein L5                                                | This is 1 of the proteins that binds and probably mediates the attachment of the 5S RNA into the large ribosomal subunit, where it forms part of the central protuberance     | J | INFORMATION STORAGE AND PROCESSING | Translation, ribosomal structure and biogenesis (J) |
| AVP33128.1 | 50S ribosomal protein L14                                               | Binds to 23S rRNA. Forms part of two intersubunit bridges in the 70S ribosome                                                                                                 | J | INFORMATION STORAGE AND PROCESSING | Translation, ribosomal structure and biogenesis (J) |
| AVP33131.1 | 50S ribosomal protein L16                                               | Binds 23S rRNA and is also seen to make contacts with the A and possibly P site tRNAs                                                                                         | J | INFORMATION STORAGE AND PROCESSING | Translation, ribosomal structure and biogenesis (J) |
| AVP33132.1 | 30S ribosomal protein S3                                                | Binds the lower part of the 30S subunit head. Binds mRNA in the 70S ribosome, positioning it for translation                                                                  | J | INFORMATION STORAGE AND PROCESSING | Translation, ribosomal structure and biogenesis (J) |
| AVP33135.1 | 50S ribosomal protein L2                                                | One of the primary rRNA binding proteins. Required for association of the 30S and 50S subunits to form the 70S ribosome, for tRNA binding and peptide bond formation.         | J | INFORMATION STORAGE AND PROCESSING | Translation, ribosomal structure and biogenesis (J) |
| AVP33136.1 | 50S ribosomal protein L23                                               | One of the early assembly proteins it binds 23S rRNA. One of the proteins that surrounds the polypeptide exit tunnel on the outside of the ribosome. Forms the main doc       | J | INFORMATION STORAGE AND PROCESSING | Translation, ribosomal structure and biogenesis (J) |
| AVP33138.1 | 50S ribosomal protein L3                                                | One of the primary rRNA binding proteins, it binds directly near the 3'-end of the 23S rRNA, where it nucleates assembly of the 50S subunit                                   | J | INFORMATION STORAGE AND PROCESSING | Translation, ribosomal structure and biogenesis (J) |
| AVP33206.1 | 50S ribosomal protein L19                                               | This protein is located at the 30S-50S ribosomal subunit interface and may play a role in the structure and function of the aminoacyl-tRNA binding site                       | J | INFORMATION STORAGE AND PROCESSING | Translation, ribosomal structure and biogenesis (J) |
| AVP33686.1 | 50S ribosomal protein L11                                               | Forms part of the ribosomal stalk which helps the ribosome interact with GTP-bound translation factors                                                                        | J | INFORMATION STORAGE AND PROCESSING | Translation, ribosomal structure and biogenesis (J) |
| AVP33687.1 | 50S ribosomal protein L1                                                | Binds directly to 23S rRNA. The L1 stalk is quite mobile in the ribosome, and is involved in E site tRNA release                                                              | J | INFORMATION STORAGE AND PROCESSING | Translation, ribosomal structure and biogenesis (J) |
| AVP34079.1 | 30S ribosomal protein S7                                                | One of the primary rRNA binding proteins, it binds directly to 16S rRNA where it nucleates assembly of the head domain of the 30S subunit. Is located at the subunit inter    | J | INFORMATION STORAGE AND PROCESSING | Translation, ribosomal structure and biogenesis (J) |
| AVP34081.1 | Elongation factor Tu                                                    | This protein promotes the GTP-dependent binding of aminoacyl-tRNA to the A-site of ribosomes during protein biosynthesis                                                      | J | INFORMATION STORAGE AND PROCESSING | Translation, ribosomal structure and biogenesis (J) |
| AVP34447.1 | hypothetical protein C6W84_10985                                        | Part of the outer membrane protein assembly complex, which is involved in assembly and insertion of beta-barrel proteins into the outer membrane                              | J | INFORMATION STORAGE AND PROCESSING | Translation, ribosomal structure and biogenesis (J) |
| AVP35129.1 | 30S ribosomal protein S2                                                | Belongs to the universal ribosomal protein uS2 family                                                                                                                         | J | INFORMATION STORAGE AND PROCESSING | Translation, ribosomal structure and biogenesis (J) |
| AXU43962.1 | Outer membrane protein assembly factor BamE                             | Part of the outer membrane protein assembly complex, which is involved in assembly and insertion of beta-barrel proteins into the outer membrane                              | J | INFORMATION STORAGE AND PROCESSING | Translation, ribosomal structure and biogenesis (J) |
| AXU43769.1 | 30S ribosome-binding factor                                             | rRNA processing                                                                                                                                                               | J | INFORMATION STORAGE AND PROCESSING | Translation, ribosomal structure and biogenesis (J) |
| AXU43566.1 | hypothetical protein C6W84_1235                                         | regulation of translation                                                                                                                                                     | J | INFORMATION STORAGE AND PROCESSING | Translation, ribosomal structure and biogenesis (J) |
| AVP35171.1 | 50S ribosomal protein L31                                               | rRNA binding                                                                                                                                                                  | J | INFORMATION STORAGE AND PROCESSING | Translation, ribosomal structure and biogenesis (J) |
| AVP35168.1 | Elongation factor P                                                     | translation elongation factor activity                                                                                                                                        | J | INFORMATION STORAGE AND PROCESSING | Translation, ribosomal structure and biogenesis (J) |
| AVP35128.1 | Elongation factor Ts                                                    | Associates with the EF-Tu.GDP complex and induces the exchange of GDP to GTP. It remains bound to the aminoacyl-tRNA.EF- Tu.GTP complex up to the GTP hydrolysis st           | J | INFORMATION STORAGE AND PROCESSING | Translation, ribosomal structure and biogenesis (J) |
| AVP35062.1 | 30S ribosomal protein S21                                               | Belongs to the bacterial ribosomal protein bS21 family                                                                                                                        | J | INFORMATION STORAGE AND PROCESSING | Translation, ribosomal structure and biogenesis (J) |
| AVP34819.1 | 30S ribosomal protein S20                                               | rRNA binding                                                                                                                                                                  | J | INFORMATION STORAGE AND PROCESSING | Translation, ribosomal structure and biogenesis (J) |
| AVP34553.1 | Ribosome-recycling factor                                               | cytoplasmic translational termination                                                                                                                                         | J | INFORMATION STORAGE AND PROCESSING | Translation, ribosomal structure and biogenesis (J) |
| AVP34407.1 | 30S ribosomal protein S6                                                | Binds together with S18 to 16S ribosomal RNA                                                                                                                                  | J | INFORMATION STORAGE AND PROCESSING | Translation, ribosomal structure and biogenesis (J) |
| AVP34405.1 | 50S ribosomal protein L9                                                | rRNA binding                                                                                                                                                                  | J | INFORMATION STORAGE AND PROCESSING | Translation, ribosomal structure and biogenesis (J) |
| AVP34406.1 | 30S ribosomal protein S18                                               | rRNA binding                                                                                                                                                                  | J | INFORMATION STORAGE AND PROCESSING | Translation, ribosomal structure and biogenesis (J) |
| AVP34078.1 | 30S ribosomal protein S12                                               | rRNA binding                                                                                                                                                                  | J | INFORMATION STORAGE AND PROCESSING | Translation, ribosomal structure and biogenesis (J) |
| AVP33936.1 | 50S ribosomal protein L20                                               | Binds directly to 23S ribosomal RNA and is necessary for the in vitro assembly process of the 50S ribosomal subunit. It is not involved in the protein synthesizing functions | J | INFORMATION STORAGE AND PROCESSING | Translation, ribosomal structure and biogenesis (J) |
| AVP33755.1 | Polyribonucleotide nucleotidyltransferase                               | polyribonucleotide nucleotidyltransferase activity                                                                                                                            | J | INFORMATION STORAGE AND PROCESSING | Translation, ribosomal structure and biogenesis (J) |
| AVP33689.1 | 50S ribosomal protein L7/L12                                            | mitochondrial gene expression                                                                                                                                                 | J | INFORMATION STORAGE AND PROCESSING | Translation, ribosomal structure and biogenesis (J) |
| AVP33688.1 | 50S ribosomal protein L10                                               | Forms part of the ribosomal stalk, playing a central role in the interaction of the ribosome with GTP-bound translation factors                                               | J | INFORMATION STORAGE AND PROCESSING | Translation, ribosomal structure and biogenesis (J) |
| AVP33209.1 | 30S ribosomal protein S16                                               | mitochondrial translation                                                                                                                                                     | J | INFORMATION STORAGE AND PROCESSING | Translation, ribosomal structure and biogenesis (J) |
| AVP33139.1 | 30S ribosomal protein S10                                               | cytoplasmic translation                                                                                                                                                       | J | INFORMATION STORAGE AND PROCESSING | Translation, ribosomal structure and biogenesis (J) |
| AVP33137.1 | 50S ribosomal protein L4                                                | Forms part of the polypeptide exit tunnel                                                                                                                                     | J | INFORMATION STORAGE AND PROCESSING | Translation, ribosomal structure and biogenesis (J) |
| AVP33134.1 | 30S ribosomal protein S19                                               | Protein S19 forms a complex with S13 that binds strongly to the 16S ribosomal RNA                                                                                             | J | INFORMATION STORAGE AND PROCESSING | Translation, ribosomal structure and biogenesis (J) |
| AVP33133.1 | 50S ribosomal protein L22                                               | The globular domain of the protein is located near the polypeptide exit tunnel on the outside of the subunit, while an extended beta-hairpin is found that lines the wall of  | J | INFORMATION STORAGE AND PROCESSING | Translation, ribosomal structure and biogenesis (J) |
| AVP33127.1 | 50S ribosomal protein L24                                               | One of the proteins that surrounds the polypeptide exit tunnel on the outside of the subunit                                                                                  | J | INFORMATION STORAGE AND PROCESSING | Translation, ribosomal structure and biogenesis (J) |
| AVP33125.1 | 30S ribosomal protein S14                                               | Binds 16S rRNA, required for the assembly of 30S particles and may also be responsible for determining the conformation of the 16S rRNA at the A site                         | J | INFORMATION STORAGE AND PROCESSING | Translation, ribosomal structure and biogenesis (J) |
| AVP33121.1 | 30S ribosomal protein S5                                                | rRNA binding                                                                                                                                                                  | J | INFORMATION STORAGE AND PROCESSING | Translation, ribosomal structure and biogenesis (J) |
| AVP33117.1 | 50S ribosomal protein L36                                               | Belongs to the bacterial ribosomal protein bL36 family                                                                                                                        | J | INFORMATION STORAGE AND PROCESSING | Translation, ribosomal structure and biogenesis (J) |
| AVP33116.1 | 30S ribosomal protein S13                                               | Located at the top of the head of the 30S subunit, it contacts several helices of the 16S rRNA. In the 70S ribosome it contacts the 23S rRNA (bridge B1a) and protein L5 of   | J | INFORMATION STORAGE AND PROCESSING | Translation, ribosomal structure and biogenesis (J) |
| AVP32907.1 | 50S ribosomal protein L21                                               | This protein binds to 23S rRNA in the presence of protein L20                                                                                                                 | J | INFORMATION STORAGE AND PROCESSING | Translation, ribosomal structure and biogenesis (J) |
| AVP32940.1 | hypothetical protein C6W84_00745                                        | long-chain fatty acid transport protein                                                                                                                                       | I | INFORMATION STORAGE AND PROCESSING | Lipid transport and metabolism (I)                  |
| AVP34156.1 | Lipase 1                                                                | Alpha beta hydrolase                                                                                                                                                          | I | INFORMATION STORAGE AND PROCESSING | Lipid transport and metabolism (I)                  |
| AVP33525.1 | Non-hemolytic phospholipase C                                           | nuclear-transcribed mRNA catabolic process, deadenylation-dependent decay                                                                                                     | K | INFORMATION STORAGE AND PROCESSING | Transcription (K)                                   |
| AVP33113.1 | DNA-directed RNA polymerase subunit alpha                               | RNA polymerase activity                                                                                                                                                       | K | INFORMATION STORAGE AND PROCESSING | Transcription (K)                                   |
| AVP32848.1 | Glycerophosphodiester phosphodiesterase, periplasmic                    | Glycerophosphoryl diester phosphodiesterase family                                                                                                                            | C | METABOLISM                         | Energy production and conversion (C)                |
| AVP32886.1 | Succinate dehydrogenase iron-sulfur subunit                             | succinate dehydrogenase                                                                                                                                                       | C | METABOLISM                         | Energy production and conversion (C)                |
| AVP32887.1 | Succinate dehydrogenase flavoprotein subunit                            | Belongs to the FAD-dependent oxidoreductase 2 family. FRD SDH subfamily                                                                                                       | C | METABOLISM                         | Energy production and conversion (C)                |
| AVP33604.1 | ATP synthase subunit beta 1                                             | Produces ATP from ADP in the presence of a proton gradient across the membrane. The catalytic sites are hosted primarily by the beta subunits                                 | C | METABOLISM                         | Energy production and conversion (C)                |
| AVP35306.1 | Electron transfer flavoprotein subunit alpha                            | Electron transfer flavoprotein                                                                                                                                                | C | METABOLISM                         | Energy production and conversion (C)                |
| AVP35307.1 | Electron transfer flavoprotein subunit beta                             | electron transfer activity                                                                                                                                                    | C | METABOLISM                         | Energy production and conversion (C)                |
| AVP35144.1 | Superoxide dismutase                                                    | Destroys radicals which are normally produced within the cells and which are toxic to biological systems                                                                      | C | METABOLISM                         | Energy production and conversion (C)                |
| AVP34412.1 | Cytochrome bo(3) ubiquinol oxidase subunit 2                            | oxidoreductase activity, acting on a heme group of donors, oxygen as acceptor                                                                                                 | C | METABOLISM                         | Energy production and conversion (C)                |
| AVP34003.1 | NADH-quinone oxidoreductase subunit I                                   | NDH-1 shuttles electrons from NADH, via FMN and iron- sulfur (Fe-S) centers, to quinones in the respiratory chain. The immediate electron acceptor for the enzyme in thi      | C | METABOLISM                         | Energy production and conversion (C)                |
| AVP34001.1 | NADH-quinone oxidoreductase subunit G                                   | ATP synthesis coupled electron transport                                                                                                                                      | C | METABOLISM                         | Energy production and conversion (C)                |
| AVP34000.1 | NADH-quinone oxidoreductase subunit F                                   | NDH-1 shuttles electrons from NADH, via FMN and iron- sulfur (Fe-S) centers, to quinones in the respiratory chain                                                             | C | METABOLISM                         | Energy production and conversion (C)                |
| AVP33998.1 | NADH-quinone oxidoreductase subunit B                                   | NDH-1 shuttles electrons from NADH, via FMN and iron- sulfur (Fe-S) centers, to quinones in the respiratory chain. The immediate electron acceptor for the enzyme in thi      | C | METABOLISM                         | Energy production and conversion (C)                |
| AVP32883.1 | Dihydropolypyllysine-residue succinyltransferase component of 2-oxoglul | S-acyltransferase activity                                                                                                                                                    | C | METABOLISM                         | Energy production and conversion (C)                |
| AVP32882.1 | Dihydropolypyl dehydrogenase                                            | cell redox homeostasis                                                                                                                                                        | C | METABOLISM                         | Energy production and conversion (C)                |
| AVP32881.1 | Succinate--CoA ligase [ADP-forming] subunit beta                        | Succinyl-CoA synthetase functions in the citric acid cycle (TCA), coupling the hydrolysis of succinyl-CoA to the synthesis of either ATP or GTP and thus represents the only  | C | METABOLISM                         | Energy production and conversion (C)                |
| AVP32880.1 | Succinate--CoA ligase [ADP-forming] subunit alpha                       | Succinyl-CoA synthetase functions in the citric acid cycle (TCA), coupling the hydrolysis of succinyl-CoA to the synthesis of either ATP or GTP and thus represents the only  | C | METABOLISM                         | Energy production and conversion (C)                |
| QDX16480.1 | Leu/Ile/Val-binding protein (plasmid)                                   | Receptor family ligand binding region                                                                                                                                         | E | METABOLISM                         | Amino acid transport and metabolism (E)             |
| QDX16481.1 | hypothetical protein C6W84_16901 (plasmid)                              | Receptor family ligand binding region                                                                                                                                         | E | METABOLISM                         | Amino acid transport and metabolism (E)             |
| AXU44003.1 | Esterase TesA                                                           | Lysophospholipase L1 and related esterases                                                                                                                                    | E | METABOLISM                         | Amino acid transport and metabolism (E)             |
| AVP34673.1 | Endonuclease YhcR                                                       | 5'-nucleotidase, C-terminal domain                                                                                                                                            | F | METABOLISM                         | Nucleotide transport and metabolism (F)             |
| AXU43517.1 | Nuclease                                                                | DNA RNA non-specific endonuclease                                                                                                                                             | F | METABOLISM                         | Nucleotide transport and metabolism (F)             |
| AVP33460.1 | hypothetical protein C6W84_04265                                        | TRAP-type C4-dicarboxylate transport system periplasmic component                                                                                                             | G | METABOLISM                         | Carbohydrate transport and metabolism (G)           |
| AVP34135.1 | Poly-beta-1,6-N-acetyl-D-glucosamine N-deacetylase                      | Hypothetical glycosyl hydrolase family 13                                                                                                                                     | G | METABOLISM                         | Carbohydrate transport and metabolism (G)           |
| AXU44186.1 | 6-phosphogluconolactonase                                               | Lactonase, 7-bladed beta-propeller                                                                                                                                            | G | METABOLISM                         | Carbohydrate transport and metabolism (G)           |
| AXU43991.1 | Aldose 1-epimerase                                                      | converts alpha-aldose to the beta-anomer                                                                                                                                      | G | METABOLISM                         | Carbohydrate transport and metabolism (G)           |
| AXU43615.1 | Aldose sugar dehydrogenase Ylii                                         | pyrroloquinoline quinone binding                                                                                                                                              | G | METABOLISM                         | Carbohydrate transport and metabolism (G)           |
| AVP34386.1 | Aldose sugar dehydrogenase Ylii                                         | pyrroloquinoline quinone binding                                                                                                                                              | G | METABOLISM                         | Carbohydrate transport and metabolism (G)           |
| AVP33022.1 | Vitamin B12 transporter BtuB                                            | TonB dependent receptor                                                                                                                                                       | P | METABOLISM                         | Inorganic ion transport and metabolism (P)          |
| AVP33193.1 | Superoxide dismutase [Cu-Zn]                                            | Destroys radicals which are normally produced within the cells and which are toxic to biological systems                                                                      | P | METABOLISM                         | Inorganic ion transport and metabolism (P)          |
| AVP33218.1 | Bacterioferritin                                                        | Iron-storage protein, whose ferroxidase center binds Fe(2 ) ions, oxidizes them by dioxygen to Fe(3 ), and participates in the subsequent Fe(3 ) oxide mineral core formati   | P | METABOLISM                         | Inorganic ion transport and metabolism (P)          |
| AVP33597.1 | High-affinity zinc uptake system protein ZnuA                           | Zinc-uptake complex component A periplasmic                                                                                                                                   | P | METABOLISM                         | Inorganic ion transport and metabolism (P)          |
| AVP33656.1 | Fe(2+) transporter FeoB                                                 | Ferrous iron transport protein B                                                                                                                                              | P | METABOLISM                         | Inorganic ion transport and metabolism (P)          |
| AVP34155.1 | Ferric enterobactin receptor                                            | TonB dependent receptor                                                                                                                                                       | P | METABOLISM                         | Inorganic ion transport and metabolism (P)          |
| AVP34214.1 | Ferrichrome-iron receptor                                               | TonB dependent receptor                                                                                                                                                       | P | METABOLISM                         | Inorganic ion transport and metabolism (P)          |
| AVP34241.1 | Copper resistance protein B                                             | Copper resistance protein B precursor (CopB)                                                                                                                                  | P | METABOLISM                         | Inorganic ion transport and metabolism (P)          |
| AVP34247.1 | Membrane lipoprotein Tpn32                                              | NLPA lipoprotein                                                                                                                                                              | P | METABOLISM                         | Inorganic ion transport and metabolism (P)          |
| AVP34394.1 | Membrane lipoprotein Tpn32                                              | NLPA lipoprotein                                                                                                                                                              | P | METABOLISM                         | Inorganic ion transport and metabolism (P)          |
| AVP34448.1 | hypothetical protein C6W84_10985                                        | Domain of unknown function (DUF4198)                                                                                                                                          | P | METABOLISM                         | Inorganic ion transport and metabolism (P)          |
| AVP34597.1 | putative TonB-dependent receptor BfrD                                   | TonB dependent receptor                                                                                                                                                       | P | METABOLISM                         | Inorganic ion transport and metabolism (P)          |
| AVP34668.1 | Molybdate-binding periplasmic protein                                   | Bacterial extracellular solute-binding protein                                                                                                                                | P | METABOLISM                         | Inorganic ion transport and metabolism (P)          |
| AVP35155.1 | Colicin I receptor                                                      | TonB dependent receptor                                                                                                                                                       | P | METABOLISM                         | Inorganic ion transport and metabolism (P)          |
| AVP35190.1 | Phosphate-binding protein PstS                                          | PBP superfamily domain                                                                                                                                                        | P | METABOLISM                         | Inorganic ion transport and metabolism (P)          |
| AVP35260.1 | Sulfate-binding protein                                                 | sulfate ABC transporter                                                                                                                                                       | P | METABOLISM                         | Inorganic ion transport and metabolism (P)          |

|            |                                                       |                                                                                                                 |    |                      |                                                                   |
|------------|-------------------------------------------------------|-----------------------------------------------------------------------------------------------------------------|----|----------------------|-------------------------------------------------------------------|
| AVP35425.1 | Ferric aerobactin receptor                            | TonB dependent receptor                                                                                         | P  | METABOLISM           | Inorganic ion transport and metabolism (P)                        |
| AXU43383.1 | hypothetical protein C6W84_0320                       | TonB dependent receptor                                                                                         | P  | METABOLISM           | Inorganic ion transport and metabolism (P)                        |
| AXU43384.1 | Ferric aerobactin receptor                            | TonB dependent receptor                                                                                         | P  | METABOLISM           | Inorganic ion transport and metabolism (P)                        |
| AXU43402.1 | putative TonB-dependent receptor                      | TonB-dependent receptor                                                                                         | P  | METABOLISM           | Inorganic ion transport and metabolism (P)                        |
| AXU43592.1 | Ferrichrome receptor FcuA                             | TonB-dependent Receptor Plug Domain                                                                             | P  | METABOLISM           | Inorganic ion transport and metabolism (P)                        |
| AXU43593.1 | Ferrichrome receptor FcuA                             | TonB-dependent Receptor Plug Domain                                                                             | P  | METABOLISM           | Inorganic ion transport and metabolism (P)                        |
| AXU43696.1 | Ferrichrome-iron receptor                             | TonB dependent receptor                                                                                         | P  | METABOLISM           | Inorganic ion transport and metabolism (P)                        |
| AXU43811.1 | putative TonB-dependent receptor BfrD                 | TonB dependent receptor                                                                                         | P  | METABOLISM           | Inorganic ion transport and metabolism (P)                        |
| AXU43812.1 | putative TonB-dependent receptor BfrD                 | TonB dependent receptor                                                                                         | P  | METABOLISM           | Inorganic ion transport and metabolism (P)                        |
| AXU44011.1 | hypothetical protein C6W84_3460                       | Capsule assembly protein Wzi                                                                                    | P  | METABOLISM           | Inorganic ion transport and metabolism (P)                        |
| AXU44161.1 | FhuE receptor                                         | TonB dependent receptor                                                                                         | P  | METABOLISM           | Inorganic ion transport and metabolism (P)                        |
| AXU44162.1 | Ferripyoverdine receptor                              | receptor                                                                                                        | P  | METABOLISM           | Inorganic ion transport and metabolism (P)                        |
| AXU44299.1 | FhuE receptor                                         | TonB dependent receptor                                                                                         | P  | METABOLISM           | Inorganic ion transport and metabolism (P)                        |
| AXU44326.1 | Vitamin B12 transporter BtuB                          | TonB dependent receptor                                                                                         | P  | METABOLISM           | Inorganic ion transport and metabolism (P)                        |
| QDX16513.1 | Fe(3+) dicitrate transport protein FecA (plasmid)     | TonB dependent receptor                                                                                         | P  | METABOLISM           | Inorganic ion transport and metabolism (P)                        |
| QDX16557.1 | Ferrichrome-iron receptor (plasmid)                   | TonB dependent receptor                                                                                         | P  | METABOLISM           | Inorganic ion transport and metabolism (P)                        |
| AVP34153.1 | Arylsulfatase                                         | Arylsulfatase A and related enzymes                                                                             | P  | METABOLISM           | Inorganic ion transport and metabolism (P)                        |
| AXU43452.1 | putative phospholipid-binding protein MlaC            | MlaC protein                                                                                                    | Q  | METABOLISM           | Secondary metabolites biosynthesis, transport, and catabolism (Q) |
| AXU44046.1 | Copper resistance protein A                           | Multicopper oxidase                                                                                             | Q  | METABOLISM           | Secondary metabolites biosynthesis, transport, and catabolism (Q) |
| AVP35097.1 | hypothetical protein C6W84_15235                      | COG0457 FOG TPR repeat                                                                                          | H  | METABOLISM           | Coenzyme transport and metabolism (H)                             |
| AVP32927.1 | putative NTE family protein                           | Patatin-like phospholipase                                                                                      | S  | POORLY CHARACTERIZED | Function unknown (S)                                              |
| AVP32953.1 | hypothetical protein C6W84_00820                      | Protein of unknown function (DUF1176)                                                                           | S  | POORLY CHARACTERIZED | Function unknown (S)                                              |
| AVP32954.1 | hypothetical protein C6W84_00825                      | Domain of unknown function (DUF4850)                                                                            | S  | POORLY CHARACTERIZED | Function unknown (S)                                              |
| AVP32982.1 | Secretory immunoglobulin A-binding protein EsIB       | Sel1-like repeats.                                                                                              | S  | POORLY CHARACTERIZED | Function unknown (S)                                              |
| AVP33073.1 | hypothetical protein C6W84_01640                      | Uncharacterized protein conserved in bacteria (DUF2147)                                                         | S  | POORLY CHARACTERIZED | Function unknown (S)                                              |
| AVP33095.1 | hypothetical protein C6W84_01800                      | Protein of unknown function (DUF3108)                                                                           | S  | POORLY CHARACTERIZED | Function unknown (S)                                              |
| AVP33169.1 | hypothetical protein C6W84_02255                      | Lysozyme inhibitor LprI                                                                                         | S  | POORLY CHARACTERIZED | Function unknown (S)                                              |
| AVP33311.1 | hypothetical protein C6W84_03245                      | Putative general bacterial porin                                                                                | S  | POORLY CHARACTERIZED | Function unknown (S)                                              |
| AVP33352.1 | hypothetical protein C6W84_03490                      | Uncharacterized protein conserved in bacteria (DUF2147)                                                         | S  | POORLY CHARACTERIZED | Function unknown (S)                                              |
| AVP33356.1 | hypothetical protein C6W84_03510                      | Putative MetA-pathway of phenol degradation                                                                     | S  | POORLY CHARACTERIZED | Function unknown (S)                                              |
| AVP33613.1 | hypothetical protein C6W84_05275                      | LysM domain                                                                                                     | S  | POORLY CHARACTERIZED | Function unknown (S)                                              |
| AVP33624.1 | hypothetical protein C6W84_05365                      | Esterase-like activity of phytase                                                                               | S  | POORLY CHARACTERIZED | Function unknown (S)                                              |
| AVP33637.1 | Porin D                                               | outer membrane porin, OprD family                                                                               | S  | POORLY CHARACTERIZED | Function unknown (S)                                              |
| AVP33638.1 | hypothetical protein C6W84_05455                      | Bacterial protein of unknown function (Gcw_chp)                                                                 | S  | POORLY CHARACTERIZED | Function unknown (S)                                              |
| AVP33837.1 | hypothetical protein C6W84_06755                      | Bacterial protein of unknown function (DUF839)                                                                  | S  | POORLY CHARACTERIZED | Function unknown (S)                                              |
| AVP33838.1 | hypothetical protein C6W84_06760                      | Bacterial protein of unknown function (DUF839)                                                                  | S  | POORLY CHARACTERIZED | Function unknown (S)                                              |
| AVP33844.1 | Secretory immunoglobulin A-binding protein EsIB       | Sel1-like repeats.                                                                                              | S  | POORLY CHARACTERIZED | Function unknown (S)                                              |
| AVP33891.1 | hypothetical protein C6W84_07095                      | TIGRFAM conserved repeat domain                                                                                 | S  | POORLY CHARACTERIZED | Function unknown (S)                                              |
| AVP34205.1 | hypothetical protein C6W84_09380                      | BON domain                                                                                                      | S  | POORLY CHARACTERIZED | Function unknown (S)                                              |
| AVP34250.1 | Putative lipoprotein                                  | Putative bacterial lipoprotein (DUF799)                                                                         | S  | POORLY CHARACTERIZED | Function unknown (S)                                              |
| AVP34251.1 | hypothetical protein C6W84_09710                      | Domain of unknown function (DUF4810)                                                                            | S  | POORLY CHARACTERIZED | Function unknown (S)                                              |
| AVP34383.1 | hypothetical protein C6W84_10550                      | ABC-type transport auxiliary lipoprotein component                                                              | S  | POORLY CHARACTERIZED | Function unknown (S)                                              |
| AVP34662.1 | hypothetical protein C6W84_12355                      | Bacterial protein of unknown function (Gcw_chp)                                                                 | S  | POORLY CHARACTERIZED | Function unknown (S)                                              |
| AVP34766.1 | hypothetical protein C6W84_13005                      | TonB C terminal                                                                                                 | S  | POORLY CHARACTERIZED | Function unknown (S)                                              |
| AVP34785.1 | hypothetical protein C6W84_13125                      | Histidine phosphatase superfamily (branch 2)                                                                    | S  | POORLY CHARACTERIZED | Function unknown (S)                                              |
| AVP34883.1 | Protein Ycel                                          | Ycel-like domain                                                                                                | S  | POORLY CHARACTERIZED | Function unknown (S)                                              |
| AVP34945.1 | hypothetical protein C6W84_14120                      | Tetratricopeptide repeat                                                                                        | S  | POORLY CHARACTERIZED | Function unknown (S)                                              |
| AVP35115.1 | hypothetical protein C6W84_15360                      | Secretory lipase                                                                                                | S  | POORLY CHARACTERIZED | Function unknown (S)                                              |
| AVP35195.1 | hypothetical protein C6W84_15930                      | Protein of unknown function (DUF541)                                                                            | S  | POORLY CHARACTERIZED | Function unknown (S)                                              |
| AVP35212.1 | putative zinc protease                                | Belongs to the peptidase M16 family                                                                             | S  | POORLY CHARACTERIZED | Function unknown (S)                                              |
| AVP35370.1 | hypothetical protein C6W84_07080                      | Domain of unknown function DUF11                                                                                | S  | POORLY CHARACTERIZED | Function unknown (S)                                              |
| AVP35404.1 | hypothetical protein C6W84_10920                      | Protein of unknown function (DUF2799)                                                                           | S  | POORLY CHARACTERIZED | Function unknown (S)                                              |
| AXU43373.1 | hypothetical protein C6W84_0270                       | Entericidin EcnA/B family                                                                                       | S  | POORLY CHARACTERIZED | Function unknown (S)                                              |
| AXU43553.1 | hypothetical protein C6W84_1170                       | Putative general bacterial porin                                                                                | S  | POORLY CHARACTERIZED | Function unknown (S)                                              |
| AXU43836.1 | hypothetical protein C6W84_2585                       | cell adhesion involved in biofilm formation                                                                     | S  | POORLY CHARACTERIZED | Function unknown (S)                                              |
| AXU44089.1 | hypothetical protein C6W84_3850                       | Peptidase M15                                                                                                   | S  | POORLY CHARACTERIZED | Function unknown (S)                                              |
| AXU44481.1 | Ferri-bacillibactin esterase BesA                     | Putative esterase                                                                                               | S  | POORLY CHARACTERIZED | Function unknown (S)                                              |
| QDX16474.1 | Porin-like protein NicP (plasmid)                     | outer membrane porin, OprD family                                                                               | S  | POORLY CHARACTERIZED | Function unknown (S)                                              |
| QDX16497.1 | hypothetical protein C6W84_16917 (plasmid)            | Spore Coat Protein U domain                                                                                     | S  | POORLY CHARACTERIZED | Function unknown (S)                                              |
| QDX16498.1 | hypothetical protein C6W84_16918 (plasmid)            | Spore Coat Protein U domain                                                                                     | S  | POORLY CHARACTERIZED | Function unknown (S)                                              |
| QDX16499.1 | hypothetical protein C6W84_16919 (plasmid)            | Spore Coat Protein U domain                                                                                     | S  | POORLY CHARACTERIZED | Function unknown (S)                                              |
| QDX16502.1 | F1 capsule-anchoring protein (plasmid)                | Outer membrane usher protein                                                                                    | S  | POORLY CHARACTERIZED | Function unknown (S)                                              |
| AXU43623.1 | hypothetical protein C6W84_1520                       | START domain                                                                                                    | S  | POORLY CHARACTERIZED | Function unknown (S)                                              |
| AVP34588.1 | hypothetical protein C6W84_11915                      | Uncharacterized protein conserved in bacteria (DUF2057)                                                         | S  | POORLY CHARACTERIZED | Function unknown (S)                                              |
| AVP34366.1 | Lipopolysaccharide export system protein LptA         | lipopolysaccharide binding                                                                                      | S  | POORLY CHARACTERIZED | Function unknown (S)                                              |
| AVP33805.1 | hypothetical protein C6W84_06540                      | Lysozyme inhibitor LprI                                                                                         | S  | POORLY CHARACTERIZED | Function unknown (S)                                              |
| AVP35175.1 | Murein hydrolase activator NlpD                       | Peptidase family M23                                                                                            | DM |                      |                                                                   |
| AVP34941.1 | Glutaminase-asparaginase                              | Asparaginase                                                                                                    | EJ |                      |                                                                   |
| AVP34920.1 | Glutamate/aspartate import solute-binding protein     | Bacterial periplasmic substrate-binding proteins                                                                | ET |                      |                                                                   |
| AVP35112.1 | Lysine/arginine/ornithine-binding periplasmic protein | Bacterial periplasmic substrate-binding proteins                                                                | ET |                      |                                                                   |
| AXU43664.1 | putative oxidoreductase YciK                          | KR domain                                                                                                       | IQ |                      |                                                                   |
| AVP32926.1 | hypothetical protein C6W84_00650                      | Forms passive diffusion pores that allow small molecular weight hydrophilic materials across the outer membrane | MU |                      |                                                                   |
| AXU43745.1 | Outer membrane protein TolC                           | Outer membrane efflux protein                                                                                   | MU |                      |                                                                   |
| AVP33220.1 | Fimbrial protein                                      | Belongs to the N-Me-Phe pilin family                                                                            | NU |                      |                                                                   |
| AVP35185.1 | hypothetical protein C6W84_15855                      | Domain of unknown function                                                                                      | NU |                      |                                                                   |
| AXU43819.1 | Lipopolysaccharide assembly protein B                 | Tetratricopeptide repeat                                                                                        | NU |                      |                                                                   |
| QDX16500.1 | putative fimbrial chaperone YadV (plasmid)            | Pili and flagellar-assembly chaperone, PapD N-terminal domain                                                   | NU |                      |                                                                   |
| AVP34824.1 | Oligopeptide transport system permease protein OppC   | ABC-type dipeptide oligopeptide nickel transport systems permease components                                    | EP |                      |                                                                   |
| AVP33889.1 | Ketol-acid reductoisomerase (NADP(+))                 | ketol-acid reductoisomerase activity                                                                            | EH |                      |                                                                   |
| AVP32856.1 | hypothetical protein C6W84_00190                      | Not Detected                                                                                                    |    |                      |                                                                   |
| AVP33009.1 | hypothetical protein C6W84_01200                      | Not Detected                                                                                                    |    |                      |                                                                   |
| AVP33028.1 | hypothetical protein C6W84_01320                      | Not Detected                                                                                                    |    |                      |                                                                   |
| AVP33176.1 | hypothetical protein C6W84_02305                      | Not Detected                                                                                                    |    |                      |                                                                   |
| AVP33177.1 | hypothetical protein C6W84_02310                      | Not Detected                                                                                                    |    |                      |                                                                   |
| AVP33248.1 | hypothetical protein C6W84_02790                      | Not Detected                                                                                                    |    |                      |                                                                   |
| AVP33279.1 | hypothetical protein C6W84_03020                      | Not Detected                                                                                                    |    |                      |                                                                   |
| AVP33373.1 | hypothetical protein C6W84_03620                      | Not Detected                                                                                                    |    |                      |                                                                   |
| AVP33580.1 | hypothetical protein C6W84_05085                      | Not Detected                                                                                                    |    |                      |                                                                   |
| AVP33692.1 | hypothetical protein C6W84_05820                      | Not Detected                                                                                                    |    |                      |                                                                   |

|            |                                            |              |  |  |  |
|------------|--------------------------------------------|--------------|--|--|--|
| AVP33693.1 | hypothetical protein C6W84_05825           | Not Detected |  |  |  |
| AVP33699.1 | hypothetical protein C6W84_05865           | Not Detected |  |  |  |
| AVP33802.1 | hypothetical protein C6W84_06525           | Not Detected |  |  |  |
| AVP33804.1 | hypothetical protein C6W84_06535           | Not Detected |  |  |  |
| AVP34186.1 | hypothetical protein C6W84_09235           | Not Detected |  |  |  |
| AVP34268.1 | hypothetical protein C6W84_09800           | Not Detected |  |  |  |
| AVP34313.1 | hypothetical protein C6W84_10080           | Not Detected |  |  |  |
| AVP34423.1 | hypothetical protein C6W84_10805           | Not Detected |  |  |  |
| AVP34425.1 | hypothetical protein C6W84_10815           | Not Detected |  |  |  |
| AVP34632.1 | hypothetical protein C6W84_12180           | Not Detected |  |  |  |
| AVP34767.1 | hypothetical protein C6W84_13010           | Not Detected |  |  |  |
| AVP35073.1 | hypothetical protein C6W84_15080           | Not Detected |  |  |  |
| AVP35178.1 | hypothetical protein C6W84_15815           | Not Detected |  |  |  |
| AVP35249.1 | hypothetical protein C6W84_16295           | Not Detected |  |  |  |
| AVP35266.1 | hypothetical protein C6W84_16390           | Not Detected |  |  |  |
| AVP35269.1 | hypothetical protein C6W84_16410           | Not Detected |  |  |  |
| AVP35311.1 | hypothetical protein C6W84_16710           | Not Detected |  |  |  |
| AVP35340.1 | hypothetical protein C6W84_03585           | Not Detected |  |  |  |
| AXU44227.1 | hypothetical protein C6W84_4540            | Not Detected |  |  |  |
| AXU44229.1 | hypothetical protein C6W84_4550            | Not Detected |  |  |  |
| QDX16346.1 | hypothetical protein C6W84_16836 (plasmid) | Not Detected |  |  |  |
| QDX16454.1 | hypothetical protein C6W84_16874 (plasmid) | Not Detected |  |  |  |
| AXU43671.1 | hypothetical protein C6W84_1760            | Not Detected |  |  |  |
| AXU43832.1 | hypothetical protein C6W84_2565            | Not Detected |  |  |  |
| AXU44012.1 | hypothetical protein C6W84_3465            | Not Detected |  |  |  |
| QDX16345.1 | hypothetical protein C6W84_16835 (plasmid) | Not Detected |  |  |  |
| QDX16527.1 | hypothetical protein C6W84_16947 (plasmid) | Not Detected |  |  |  |
| QDX16528.1 | hypothetical protein C6W84_16948 (plasmid) | Not Detected |  |  |  |
| AXU43800.1 | hypothetical protein C6W84_2405            | Not Detected |  |  |  |
| AVP35177.1 | hypothetical protein C6W84_15810           | Not Detected |  |  |  |
| AVP34770.1 | hypothetical protein C6W84_13030           | Not Detected |  |  |  |
| AVP34616.1 | hypothetical protein C6W84_12080           | Not Detected |  |  |  |
| AVP34515.1 | hypothetical protein C6W84_11490           | Not Detected |  |  |  |
| AVP33197.1 | hypothetical protein C6W84_02440           | Not Detected |  |  |  |
| AVP33179.1 | hypothetical protein C6W84_02335           | Not Detected |  |  |  |
| AVP33107.1 | hypothetical protein C6W84_01910           | Not Detected |  |  |  |
| AVP32961.1 | hypothetical protein C6W84_00880           | Not Detected |  |  |  |
| AVP32904.1 | hypothetical protein C6W84_00515           | Not Detected |  |  |  |

**Table S2: List of TonB Dependent Transporters (TonRs) detected in OMVs of *A. baumannii* DS002.**

| Accession no. (gi no) | Protein name                                       | Gene name          | Mol. weight (kDa) | PI   | sequence coverage (%) | #Peptides |
|-----------------------|----------------------------------------------------|--------------------|-------------------|------|-----------------------|-----------|
| 1472139223            | putative TonB-dependent receptor BfrD              | <i>bfrD_1</i>      | 67.1              | 6.96 | 58                    | 36        |
| 1472139224            | putative TonB-dependent receptor BfrD              | <i>bfrD_2</i>      | 19.7              | 8.94 | 52                    | 11        |
| 1367986576            | putative TonB-dependent receptor BfrD              | <i>bfrD_3</i>      | 77.9              | 6.15 | 48                    | 36        |
| 1367985001            | Vitamin B12 transporter BtuB                       | <i>btuB_1</i>      | 67.9              | 5.27 | 68                    | 43        |
| 1367985595            | Vitamin B12 transporter BtuB                       | <i>btuB_2</i>      | 77.4              | 6.19 | 37                    | 25        |
| 1472139738            | Vitamin B12 transporter BtuB                       | <i>btuB_3</i>      | 45                | 5.2  | 9                     | 3         |
| 1472138795            | hypothetical protein C6W84_0320                    | <i>C6W84_0320</i>  | 16.7              | 5.07 | 9                     | 1         |
| 1472138814            | putative TonB-dependent receptor                   | <i>C6W84_0415</i>  | 16.7              | 5.07 | 8                     | 3         |
| 1367986745            | hypothetical protein C6W84_13005                   | <i>C6W84_13005</i> | 14.2              | 5.24 | 67.5                  | 6         |
| 1367987134            | Colicin I receptor                                 | <i>cirA_2</i>      | 100.8             | 7.66 | 5                     | 3         |
| 1472139004            | Ferrichrome receptor FcuA                          | <i>fcuA_1</i>      | 26                | 6.55 | 15                    | 4         |
| 1472139005            | Ferrichrome receptor FcuA                          | <i>fcuA_2</i>      | 41.4              | 6.8  | 28                    | 7         |
| 1714623787            | Fe (3+) dicitrate transport protein FecA (plasmid) | <i>fecA</i>        | 77.2              | 5.47 | 57                    | 29        |
| 1367985635            | Fe (2+) transporter FeoB                           | <i>feoB</i>        | 67.5              | 7.05 | 2                     | 1         |
| 1472139108            | Ferrichrome-iron receptor                          | <i>fhuA_3</i>      | 80.1              | 6.02 | 11                    | 6         |
| 1367986193            | Ferrichrome-iron receptor                          | <i>fhuA_4</i>      | 78.2              | 5.81 | 37                    | 21        |
| 1714623831            | Ferrichrome-iron receptor (plasmid)                | <i>fhuA_5</i>      | 76.6              | 5.47 | 43                    | 32        |
| 1472139573            | FhuE receptor                                      | <i>fhuE_1</i>      | 52.3              | 4.91 | 4                     | 1         |
| 1472139711            | FhuE receptor                                      | <i>fhuE_2</i>      | 79.2              | 5.06 | 25                    | 14        |
| 1472139574            | Ferripyoverdine receptor                           | <i>fpvA</i>        | 11.7              | 8.88 | 10                    | 1         |
| 1472138796            | Ferric aerobactin receptor                         | <i>iutA_1</i>      | 63.3              | 5.82 | 14                    | 8         |
| 1367987404            | Ferric aerobactin receptor                         | <i>iutA_3</i>      | 80.7              | 5.35 | 53                    | 37        |
| 1367986134            | Ferric enterobactin receptor                       | <i>pfeA</i>        | 82.8              | 5.78 | 15                    | 11        |
| 1472139893            | Ferri-bacillibactin esterase BesA                  | <i>besA</i>        | 35.6              | 8.9  | 5                     | 1         |

| Strains                                 | Relevant characteristics                                                                                 | Reference or source                                                              |
|-----------------------------------------|----------------------------------------------------------------------------------------------------------|----------------------------------------------------------------------------------|
| <i>Acinetobacter baumannii</i> DS002    | Wild type strain. Cmr, Smr                                                                               | Longkumer et al. 2013                                                            |
| <i>E. coli. DH5 <math>\alpha</math></i> | $\lambda$ supE44, $\Delta$ lacU169 ( $\Delta$ 80 lacZ $\Delta$ M15) hsdR17 recA1 endA1 gyrA96 thi1 relA1 | Hanahan 1983                                                                     |
| <i>E. coli. NiCo21(DE3)</i>             | BL21(DE3) glmS6Ala slyD-CBD can-CBD arnA-CBD                                                             | Robichon et al. 2011                                                             |
| <b>Plasmids</b>                         |                                                                                                          |                                                                                  |
| pET28a                                  | Km <sup>r</sup> , Expression Vector                                                                      | Novagen.                                                                         |
| pGD1                                    | Km <sup>r</sup> , Expression plasmid, Codes for OmpA <sup>N6xHis</sup>                                   | This study                                                                       |
| pTRW1                                   | Amp <sup>r</sup> , Expression Plasmid, Codes for RepA <sup>N6xHis</sup>                                  | Longkumer et al. 2013                                                            |
| <b>Primers</b>                          |                                                                                                          |                                                                                  |
| GD1 FP                                  | GCCTCACATATGAAATTGAGTCGTATTGCACTTG                                                                       | Primers used to amplify <i>ompA</i> gene as <i>NdeI</i> and <i>XhoI</i> fragment |
| GD1 RP                                  | TTGACTCTCGAGTTGAGCTTGTGGACCAGGTT                                                                         |                                                                                  |

**Table S3: List of Strains, plasmids and primers.**

**Table S4: Gradient used for separating peptides.**

**Gradient: SolnA-5%ACN+.1%FA SolnB-95%ACN+0.1%FA**

| Time [mm:ss] | Duration [mm:ss] | Flow [nl/min] | Mixture [%B] |
|--------------|------------------|---------------|--------------|
| 00:00        | 00:00            | 300           | 0            |
| 38:00        | 38:00            | 300           | 25           |
| 45:00        | 07:00            | 300           | 40           |
| 50:00        | 05:00            | 300           | 90           |
| 55:00        | 05:00            | 300           | 90           |
| 60:00        | 05:00            | 300           | 3            |
